# Supplementary material
Source: publisher figshare collection journal article supplement (https://acs.figshare.com/ndownloader/files/4385707)

**Supporting information:**

# Tuning the optical characteristics of poly(p-phenylenevinylene) by in-situ Au-nanoparticle generation

*Gunin Saikia,<sup>1</sup> A. Murugadoss,<sup>1</sup> Pranjol Jyoti Sarmah,<sup>1</sup> Arun Chattopadhyay,<sup>1,2\*</sup>*

*Parameswar Krishnan Iyer<sup>1\*</sup>*

<sup>1</sup>Department of Chemistry, Indian Institute of Technology Guwahati, Guwahati-781039

Assam, India

<sup>2</sup>Center for Nanotechnology, Indian Institute of Technology Guwahati, Guwahati-

781039 Assam, India

E-mail: [arun@iitg.ernet.in](mailto:arun@iitg.ernet.in), [pki@iitg.ernet.in](mailto:pki@iitg.ernet.in)

**RECEIVED DATE (to be automatically inserted after your manuscript is accepted if required according to the journal that you are submitting your paper to)**

**Polymer (DHPPV)** was synthesised and well characterized with various spectroscopic tools such as FTIR,  $^1\text{H}$ NMR,  $^{13}\text{C}$ NMR. Molecular weight was determined by using gel permeation chromatography and found to be 34410, PDI=2.10. DHPPV is thermally stable up to 400 °C determined by using TGA.

**Instrument Description:** Scanning electron micrograph (SEM) images were obtained by means of a LEO-1430 VP electron microscope and ZEISS Sigma VP Field Emission Scanning electron micrograph (FESEM) on samples glued on an aluminum stub and gold sputtered. FT-IR analysis was carried out on air-dried samples with a Perkin Elmer-Spectrum One FT-IR Spectrometer from 4000 to 450  $\text{cm}^{-1}$ . UV-visible spectra were recorded, by dissolving a calculated amount of the sample in an appropriate solvent, on a Hitachi UV-visible U-2001 Spectrophotometer or on a Perkin Elmer Lambda 25 UV-visible Spectrophotometer. For the PL measurements, a Varian Cary Eclipse fluorescence spectrophotometer was used. The excitation wavelengths of these samples were in the range of 480 nm to 434 nm. Transmission Electron Microscopy (TEM) of the composite solutions, placed on carbon coated copper grids, was performed using JEOL-2100 equipment operating at a maximum acceleration voltage at 200 kV. The TEM samples were prepared by drop casting the liquid samples on copper grid of 300 mesh followed by evaporation of solvent at room temperature. Particle Size Analysis was done by Differential Light Scattering (DLS) method. 20 mL portion (in chloroform) of the DHPPVAuNP in chloroform solution was taken in a cell for which particle size distribution was measured using a HORIBA LB-550 instrument.

Figure S1:  $^1\text{H}$ NMR Spectra of DHPPV in  $\text{CDCl}_3$ .

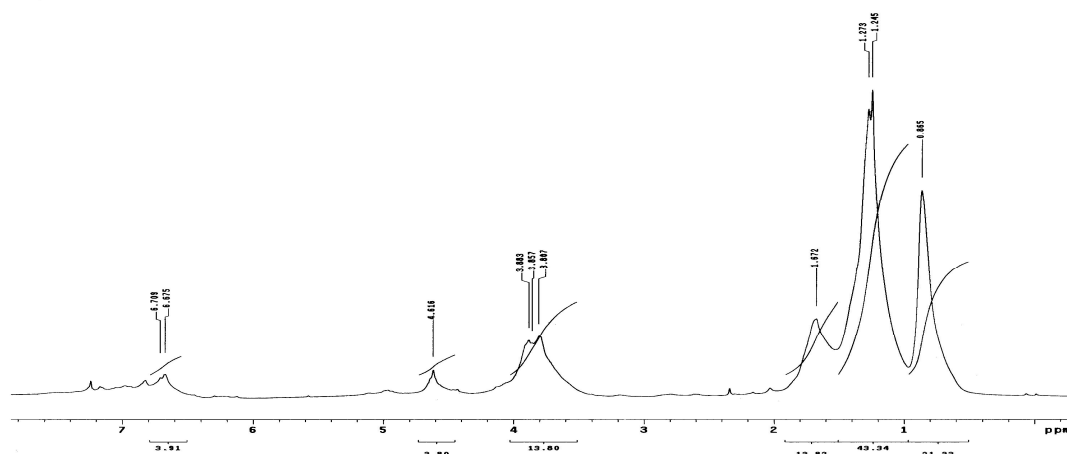

Figure S2:  $^{13}\text{C}$ NMR Spectra of DHPPV in  $\text{CDCl}_3$

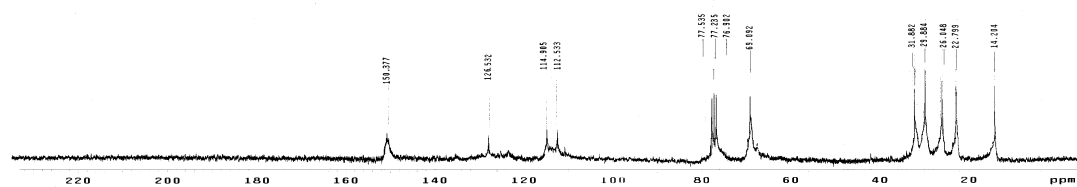

Figure S3: FTIR spectra of DHPPV.

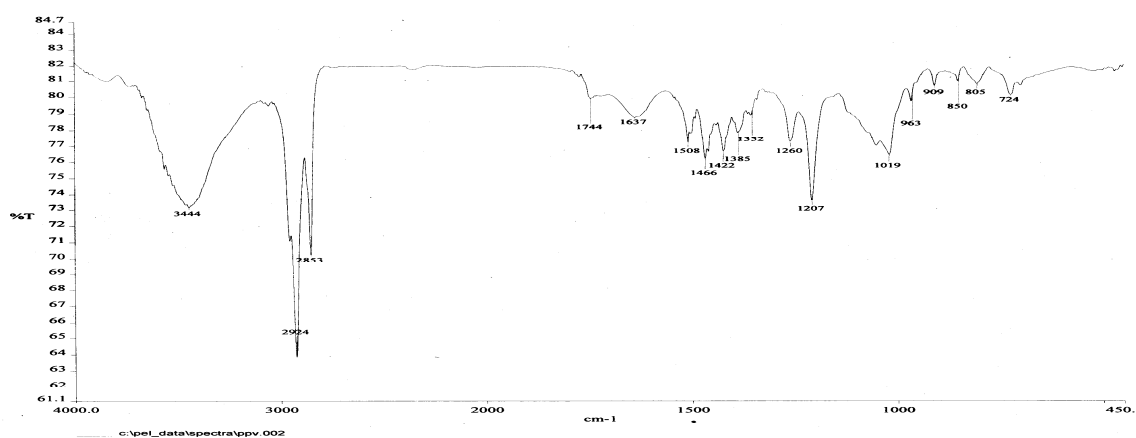

Figure S4: **Gel Permeation Chromatography** of DHPPV (Mol wt. =34410, PDI=2.10)

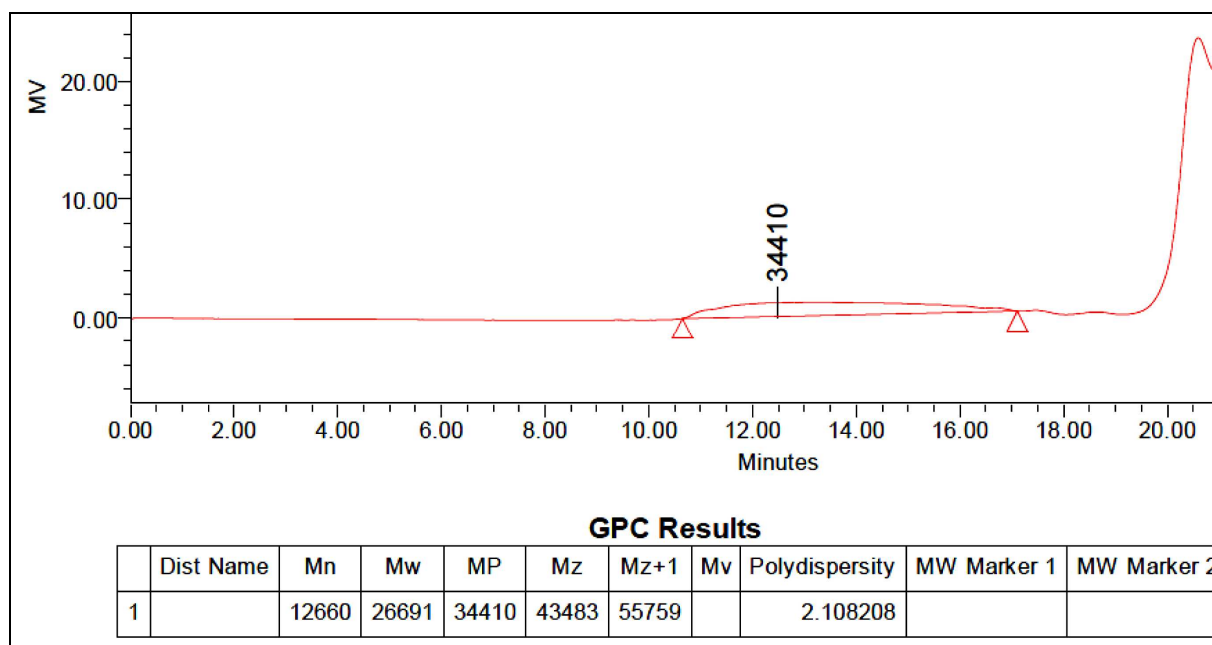

Figure S5: **TGA** of DHPPV in THF(tetrahydrofuran).

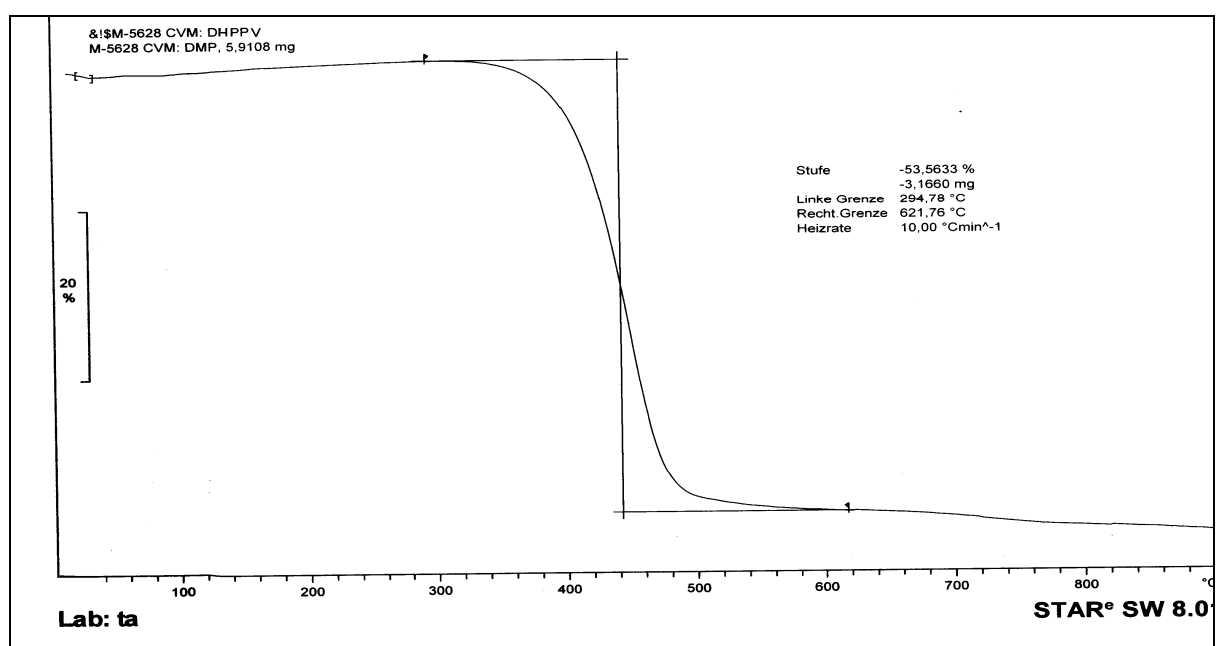

Figure S6: **SEM** Micrograph of DHPPVAu nano composite.

A= DHPPVAuNP composite at 12  $\mu\text{L}$   $\text{HAuCl}_4$  concentration. B= DHPPVAuNP composite at 18  $\mu\text{L}$   $\text{HAuCl}_4$  concentration. C= DHPPVAuNP composite at 24  $\mu\text{L}$   $\text{HAuCl}_4$  concentration. D= DHPPVAuNP composite at 60  $\mu\text{L}$   $\text{HAuCl}_4$  concentration

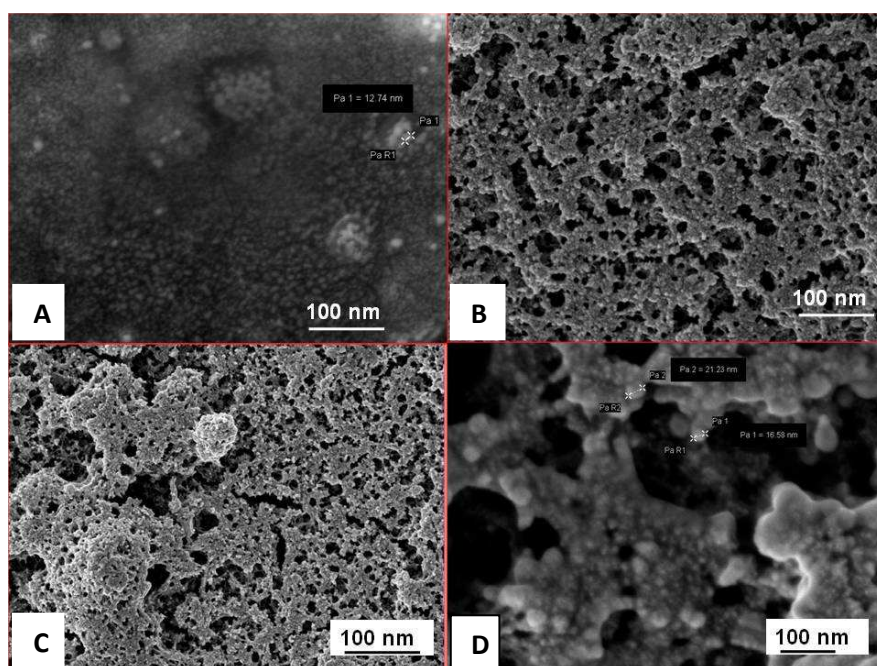

Figure S7: **EDX** Profile of DHPPV.

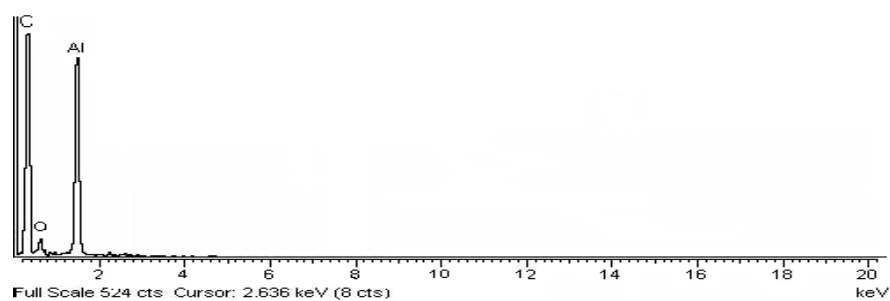

Figure S8: **EDX** Profile of DHPPVAu NP composite 6 $\mu$ L HAuCl<sub>4</sub>.

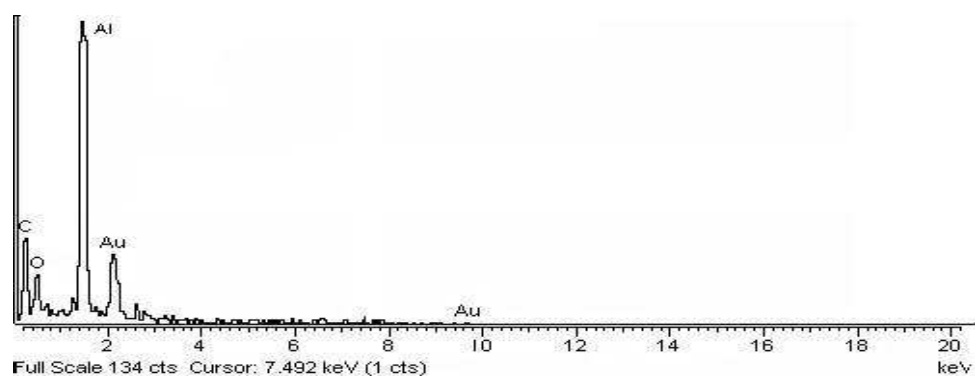

Figure S9: **TEM** image of DHPPV-AuNP composite at 12  $\mu$ L (A) and 60  $\mu$ L (B) of HAuCl<sub>4</sub> concentration.

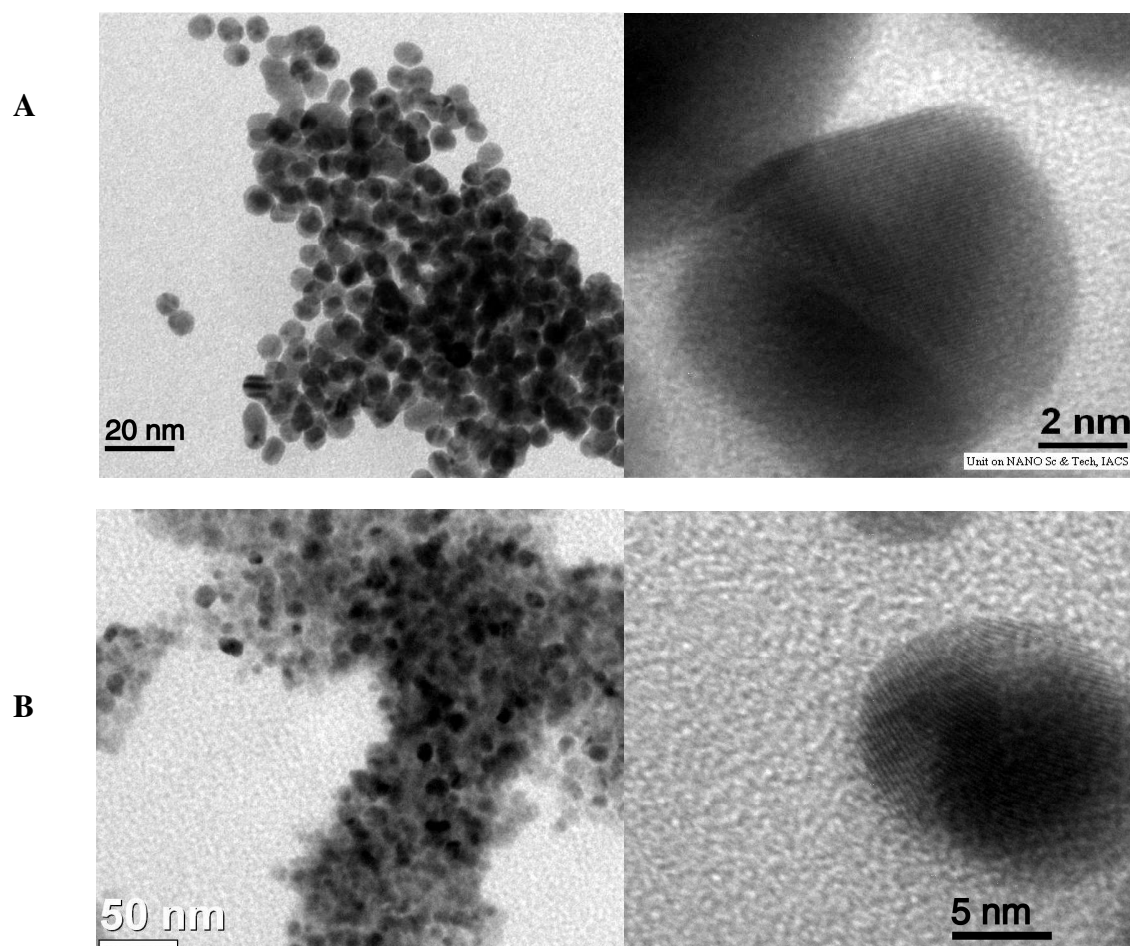

**Figure S10:**  $^1\text{H}$ NMR Spectra of DHPPV-AuNP composite in  $\text{CDCl}_3$ .

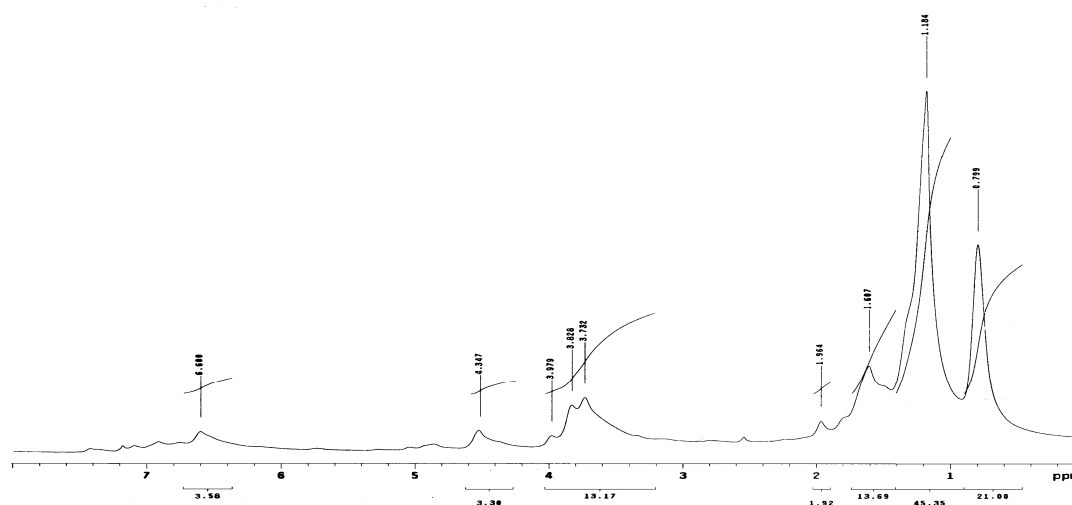

**Figure S11:**  $^1\text{H}$ NMR Spectra of octadecanethiol treated DHPPV-AuNP composite in  $\text{CDCl}_3$ .

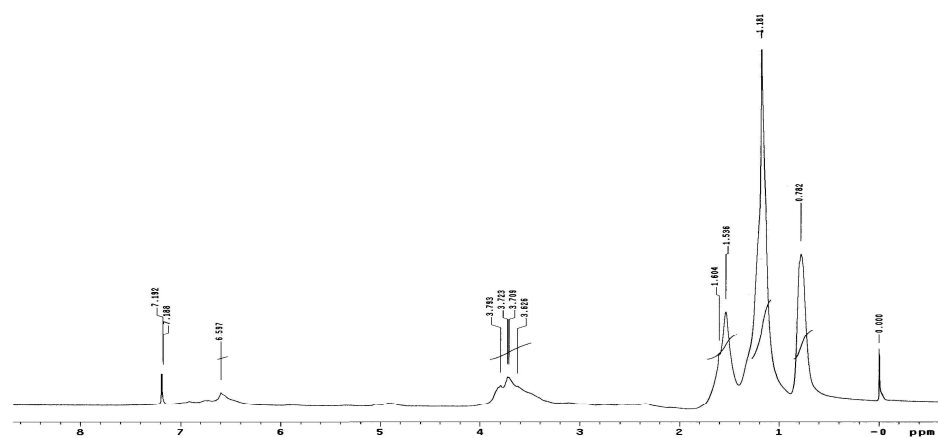

**Figure S12:** Particle distribution in various  $\text{HAuCl}_4$  concentration.

A= DHPPVAuNP composite at 12  $\mu\text{L}$   $\text{HAuCl}_4$  concentration. B= DHPPVAuNP composite at 18  $\mu\text{L}$   $\text{HAuCl}_4$  concentration. C= DHPPVAuNP composite at 24  $\mu\text{L}$   $\text{HAuCl}_4$  concentration. D= DHPPVAuNP composite at 60  $\mu\text{L}$   $\text{HAuCl}_4$  concentration

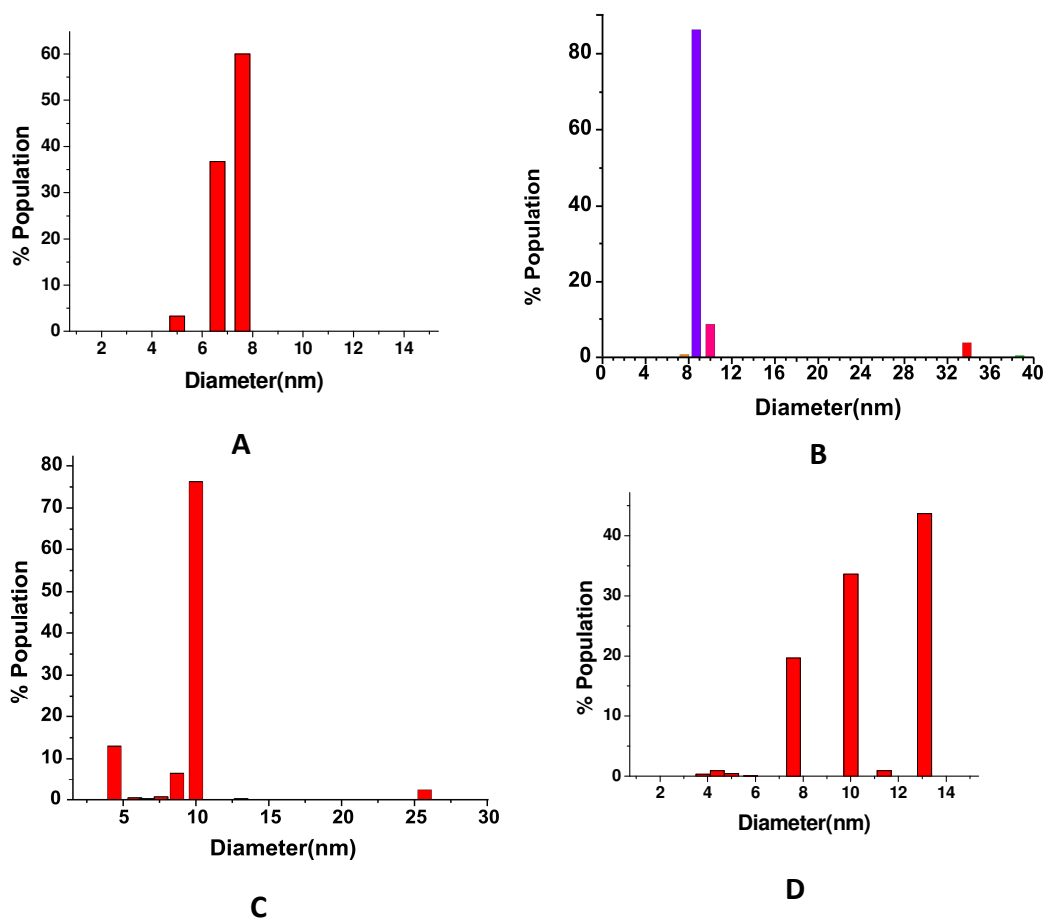

**Figure S13.** UV/Vis spectra of DHPPV and its nanocomposites at varying quantity of  $\text{HAuCl}_4$  in Chloroform.

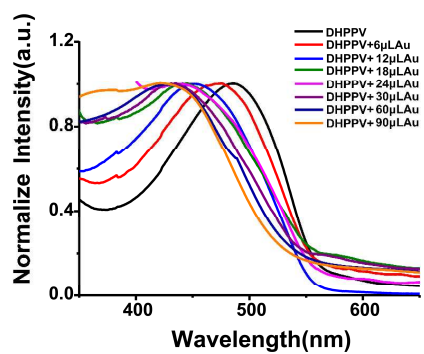

Supplement: Supplementary file 1 [file 4385707]
